# Supplementary material
Source: PubMed Central journal article supplement (PMC8488785)
Supplement: ONCO-26-e1800-s001.pdf [file ONCO-26-e1800-s001.pdf]

Supplemental Appendix for:  
Province-Wide Analysis of Patient Reported Outcomes for Stage IV Non-Small Cell Lung Cancer  
Alexander Louie et al.

| <b>Appendix A. Main variables definitions using Ontario healthcare databases.</b> |                                                                                                                                                                    |                                                                                                                                                                                                                                                                                                                                                                                                                                                                                                                                                                                                                                                                                                                                                                                  |
|-----------------------------------------------------------------------------------|--------------------------------------------------------------------------------------------------------------------------------------------------------------------|----------------------------------------------------------------------------------------------------------------------------------------------------------------------------------------------------------------------------------------------------------------------------------------------------------------------------------------------------------------------------------------------------------------------------------------------------------------------------------------------------------------------------------------------------------------------------------------------------------------------------------------------------------------------------------------------------------------------------------------------------------------------------------|
| <b>Variable</b>                                                                   | <b>Data Source</b>                                                                                                                                                 | <b>Code Strategy</b>                                                                                                                                                                                                                                                                                                                                                                                                                                                                                                                                                                                                                                                                                                                                                             |
| Stage IV NSCLC diagnosis                                                          | Ontario Cancer Registry (OCR)                                                                                                                                      | <p><b>ICD-O-3 topography:</b><br/>Lung: C34.0-34.3, C34.8, and C34.9</p> <p><b>ICD-O-3 histology:</b><br/><i>Included</i><br/><u>Squamous cell carcinoma</u>: 8070/3, 8070/6, 8071/3, 8072/3, 8074/3, 8075/3, 8073/3, 8084/3, and 8083/3.<br/><u>Adenocarcinoma</u>: 8140/3, 8140/6, 8310/3, 8480/3, 8481/3, 8255/3, 8480/3, 8250/3, 8251/3, 8252/3, 8253/3, and 8254/3.<br/><u>Large cell carcinoma</u>: 8012/3, 8013/3, 8014/3, and 8246/3.<br/><u>Adenosquamous carcinoma</u>: 8560/3.</p> <p><i>Excluded</i><br/><u>Carcinoid</u>: 8240/3, 8241/3, 8242/1, 8242/3, 8243/3, and 8249/3.<br/><u>Mesothelioma</u>: 9050/3, 9051/0, 9050/0, 9051/3, 9052/0, 9052/3, 9053/3, 9055/0, and 9055/1.<br/><u>Small cell carcinoma</u>: 8041/3, 8042/3, 8043/3, 8044/3, and 8045/3.</p> |
| Edmonton Symptom Assessment System (ESAS) scores and time                         | Symptoms Management Reporting Database (SMRD)                                                                                                                      | If >1 ESAS completed in a month, highest scores were used for analysis.                                                                                                                                                                                                                                                                                                                                                                                                                                                                                                                                                                                                                                                                                                          |
| Sex                                                                               | Registered Person database (RPDB)                                                                                                                                  | -                                                                                                                                                                                                                                                                                                                                                                                                                                                                                                                                                                                                                                                                                                                                                                                |
| Age at diagnosis                                                                  | OCR                                                                                                                                                                | -                                                                                                                                                                                                                                                                                                                                                                                                                                                                                                                                                                                                                                                                                                                                                                                |
| Elixhauser comorbidity index                                                      | National Ambulatory Care Reporting System (NARCS)<br>CIHI-Discharge abstract database (DAD)<br>CIHI-Same day surgery (SDS)<br>Ontario Health Insurance Plan (OHIP) | Calculated based on ICD diagnosis codes identified in administrative databases <sup>42</sup> .                                                                                                                                                                                                                                                                                                                                                                                                                                                                                                                                                                                                                                                                                   |
| Immigration status                                                                | Immigration, Refugees, and Citizenship Canada (IRCC)                                                                                                               | -                                                                                                                                                                                                                                                                                                                                                                                                                                                                                                                                                                                                                                                                                                                                                                                |

Supplemental Appendix for:  
Province-Wide Analysis of Patient Reported Outcomes for Stage IV Non-Small Cell Lung Cancer  
Alexander Louie et al.

|                              |                                               |                                                                                                |
|------------------------------|-----------------------------------------------|------------------------------------------------------------------------------------------------|
| Neighborhood income quintile | Canadian Census RPDB                          | Ecologic measure of income based on the median income of a patient's postal code of residence. |
| Residence                    | RPDB                                          | Based on Rurality Index of Ontario <sup>19</sup> .                                             |
| Radiotherapy                 | OHIP<br>Cancer Activity Level Reporting (ALR) | -                                                                                              |
| Systemic therapy             | OHIP<br>Cancer ALR                            | -                                                                                              |
| Diagnosis year               | OCR                                           | -                                                                                              |
| Time of death                | RPDB                                          | -                                                                                              |
